# Supplementary material
Source: HighWire-hosted journal article supplement (https://srh.bmj.com/content/48/2/93)
Supplement: inline-supplementary-material-1 [file inline-supplementary-material-1.pdf]

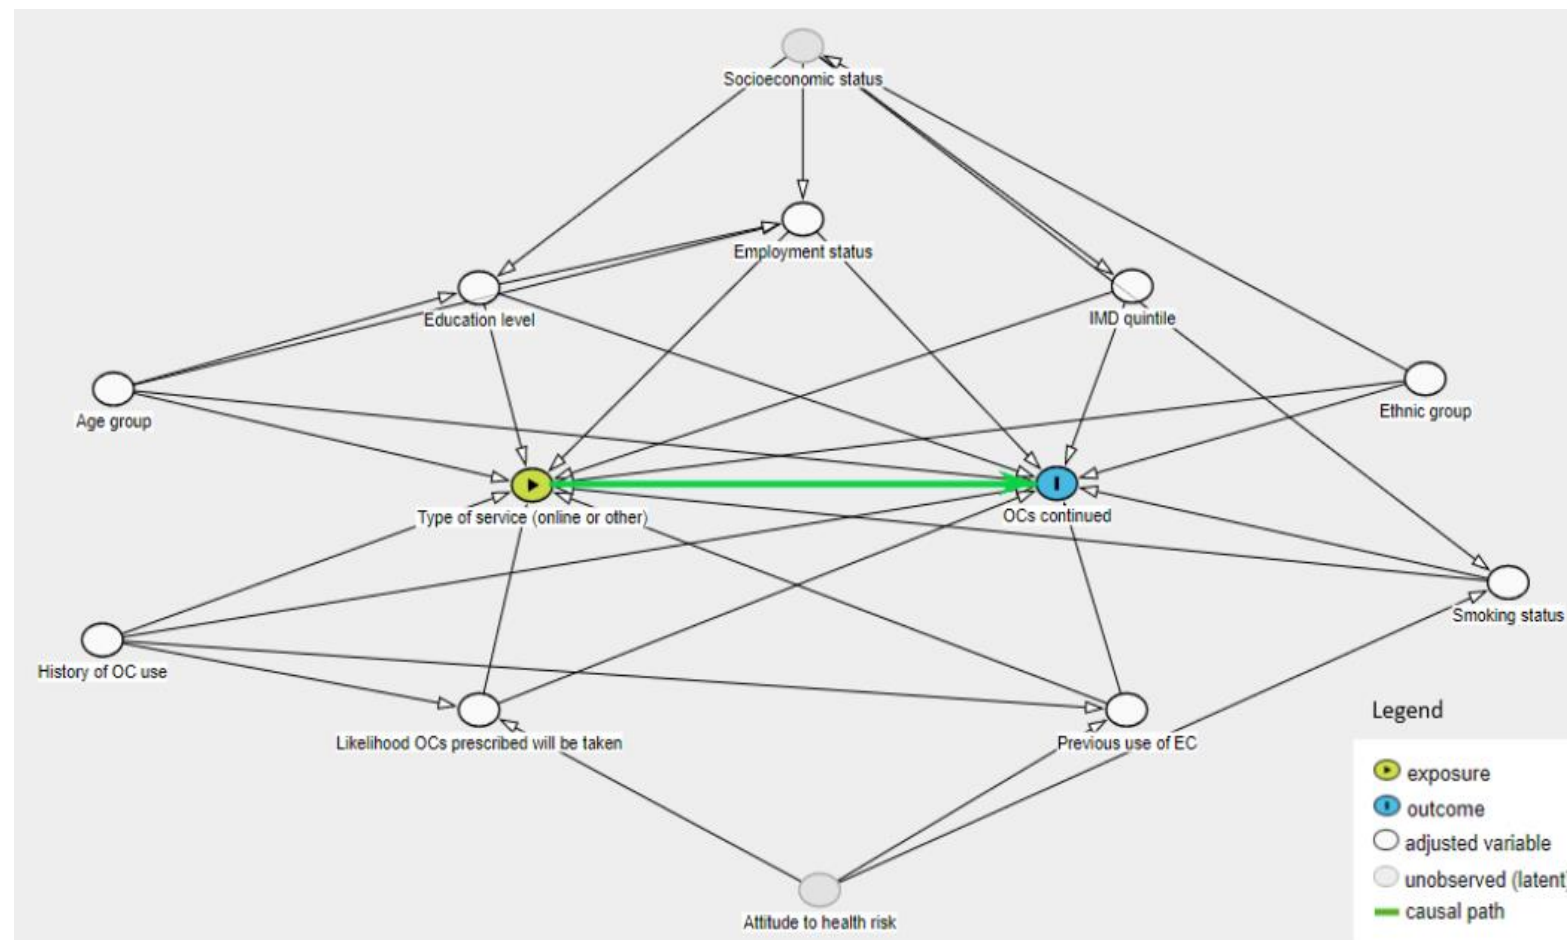

Supplementary Figure 1 Directed Acyclic Graph (DAG) for fully adjusted analysis of primary outcome

IMD: Index of Multiple Deprivation; OC: oral contraceptives; EC: emergency contraception
